# Supplementary material for: Regulation of PCGEM1 by p54/nrb in prostate cancer
Source: PubMed Central journal article supplement (PMC5041109; doi:10.1038/srep34529), 2016-09-29

## **Regulation of PCGEM1 by p54/nrb in prostate cancer**

Tsui-Ting Ho<sup>1</sup>, Jianguo Huang<sup>2,3</sup>, Nanjiang Zhou<sup>2,4</sup>, Ziqiang Zhang<sup>5</sup>, Pratirodh Koirala<sup>2</sup>, Xinchun Zhou<sup>6</sup>, Fangting Wu<sup>4</sup>, Xianfeng Ding<sup>1,7</sup>, Yin-Yuan Mo<sup>1\*</sup>

Supplementary Table 1, Primers used in this study

**ChIP Primers**

|                  |                       |
|------------------|-----------------------|
| PCGEM1-ChIP-5.1  | ttgatccttagcatgcttcac |
| PCGEM1-ChIP-5.2  | gaaaaaattgctgggttata  |
| PCGEM1-ChIP-5.3  | gaaaacatgcatatgtttcc  |
| PCGEM1-ChIP-5.4  | tttaaagtttcagggttggtg |
| PCGEM1-ChIP-3.1  | caggagcactgagggatatt  |
| PCGEM1-ChIP-3.2  | caagacataaagtagaaagt  |
| PCGEM1-ChIP-3.3  | agcacaataatataactac   |
| PCGEM1-ChIP-3.4  | aatggactcatacaaacatc  |
| PCGEM1-ChIP-5.5  | tttagtgtaattagcagggga |
| PCGEM1-ChIP-3.5  | gaaactgtgtgccctgaaaa  |
| PCGEM1-ChIP-5.6  | ctttatgtcttgatggat    |
| PCGEM1-ChIP-3.6  | tacaacgtgcagtgaaagcct |
| PCGEM1-ChIP-5.7  | atctctttgacattcgacta  |
| PCGEM1-ChIP-3.7  | tgatttggcattatcttgta  |
| PCGEM1-ChIP-5.8  | aaagtgatatgagcactgga  |
| PCGEM1-ChIP-3.8  | gatgatgactttatgggtgg  |
| PCGEM1-ChIP-5.9  | catgagtttcaagctagaga  |
| PCGEM1-ChIP-3.9  | gtggttagtggcagtttagca |
| PCGEM1-ChIP-5.10 | attctgtgcttattatccag  |
| PCGEM1-ChIP-3.10 | tcacagactaagagatgggt  |
| PCGEM1-ChIP-5.11 | gcatctcagtattaagtgga  |
| PCGEM1-ChIP-3.11 | acagccaactgatacaaaa   |
| PCGEM1-ChIP-5.12 | atctgcattcttcattaac   |
| PCGEM1-ChIP-3.12 | gctatctaaatctaaggtta  |
| PCGEM1-ChIP-5.13 | gtatgggcaattcttgctca  |
| PCGEM1-ChIP-3.13 | gaagaatgcagatttcaacc  |
| PCGEM1-ChIP-5.14 | aggaatacagagcaccgact  |
| PCGEM1-ChIP-3.14 | gcccatacaagccctaatcc  |
| PCGEM1-ChIP-5.15 | agattgggtcccttatatcaa |
| PCGEM1-ChIP-3.15 | cctaggatttaggatttgta  |
| PCGEM1-ChIP-5.16 | agcgtcaccaaagagatagt  |
| PCGEM1-ChIP-3.16 | ggaccaatctcctgtttact  |
| PCGEM1-ChIP-5.17 | gcagaaccaactttaagat   |
| PCGEM1-ChIP-3.17 | tgtagccacaatagctctaa  |
| PCGEM1-ChIP-5.18 | tttgtaaagctgatttaga   |
| PCGEM1-ChIP-3.18 | ttgtatgtgtgatacctaga  |
| PCGEM1-ChIP-5.19 | caagacaacactgaaggatt  |
| PCGEM1-ChIP-3.19 | aataatgactgaagagctgc  |

**To make SAM sgRNAs against the PCGEM1 promoter**

|              |                            |
|--------------|----------------------------|
| PCGEM1p-5.1A | CACCgTGGCAGAACAAGCAACTATG  |
| PCGEM1p-5.2A | CACCgGGGCACCAATATACTCATAC  |
| PCGEM1p-5.3A | CACCgTGCTCCCCATTTTTTCCTAT  |
| PCGEM1p-5.4A | CACCgTGAATTAACAGGAGCACTGA  |
| PCGEM1p-5.5A | CACCgTGAAATTATGTATAAAAACAG |
| PCGEM1p-3.1B | aaacCATAGTTGCTTGTCTGCCAC   |

PCGEM1p-3.2B      aaacGTATGAGTATATTGGTGCCCc  
PCGEM1p-3.3B      aaacATAGGAAAAAATGGGGAGCAC  
PCGEM1p-3.4B      aaacTCAGTGCTCCTGTTAATTCAC  
PCGEM1p-3.5B      aaacCTGTTTTATACATAATTTAC

**To clone p54/nrb**

NONO-Myc-R1-5.1      CCATGGAGGCCCGAATTCTGCAGAGTAATAAAACTTTTAA  
NONO-Myc-Not1--3.1      TCGCAGATCCTTGCGGCCGCTTAGTATCGGCGACGTTTGT

**To knock out p54/nrb**

NONO gRNA1      AGTGCTCTGGCTTTTGTCAG  
NONO gRNA2      TGAGGCATGTGCTCTAAAGG  
NONO-left-recomb-5.1      CCTCCAGCTCCAGCCTCCTG  
NONO-left-recomb-3.1      TTTGTTACTTTGAACAACCA  
NONO-right-recomb-5.1      AGCTGGAGAATAATAGATGT  
NONO-right-recomb-3.1      TGCCTGGTTAATTCAATTTA

**To make PCGEM1 luciferase reporters**

Luc-B-PCGEM1p-Kpn-5.1      TTTCTCTATCGATAGGTACCTTGATCTTAGCATGCTTCAC  
Luc-B-PCGEM1p-Xho1-3.1      CTTAGATCGCAGATCTCGAGCAGGAGCACTGAGGGATATT  
Luc-B-PCGEM1p-Kpn-5.2      TTTCTCTATCGATAGGTACCGAAAAAATTGCTGGGTTATA  
Luc-B-PCGEM1p-Xho1-3.2      CTTAGATCGCAGATCTCGAGCAAGACATAAAGTAGAAAGT  
Luc-B-PCGEM1p-Kpn-5.4      TTTCTCTATCGATAGGTACCTTTAAAGTTTCAGGTTGTT  
Luc-B-PCGEM1p-Xho1-3.3      CTTAGATCGCAGATCTCGAGAGCACAAATAATATAACTAC

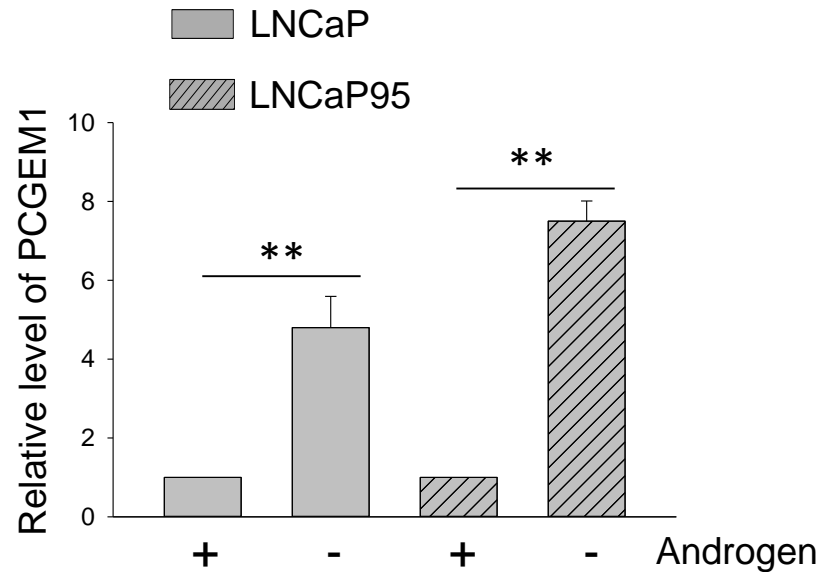

Fig. S1 Induction of PCGEM1 by androgen deprivation. Detection of PCGEM1 in LNCaP and LNCaP95, which is an androgen-independent cell line derived from long-term continuous culture of LNCaP cells in androgen-depleted conditions by qRT-PCR. PCGEM1 was progressively induced in LNCaP and LNCaP95 cells by androgen-deprivation (- androgen).

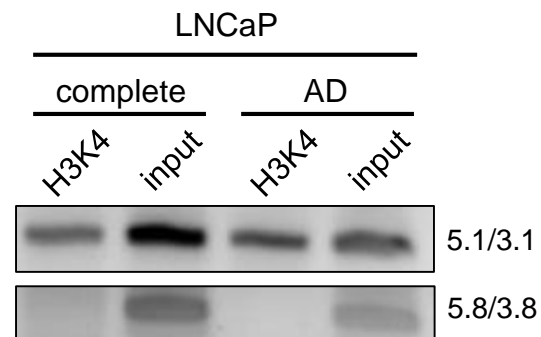

Fig. S2 Androgen deprivation increases the binding of H3K4 to PCGEM1 promoter in LNCaP cells, as determined by histone ChIP assays.

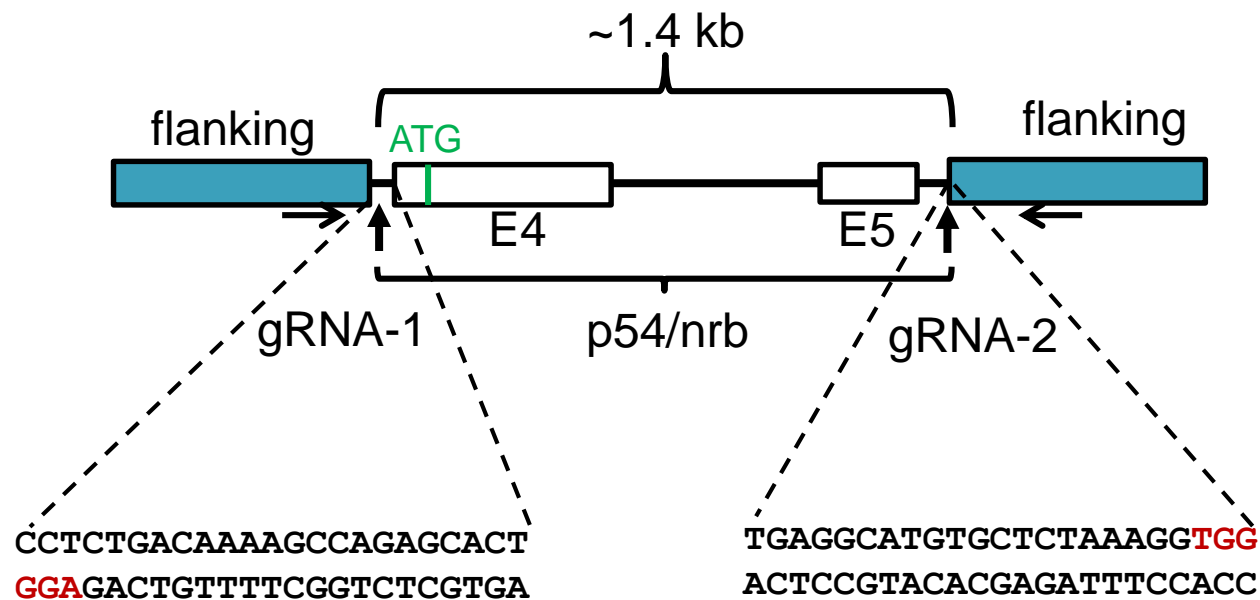

Fig. S3 Strategy for knockout of p54/nrb in CWR22Rv1 cells.

A

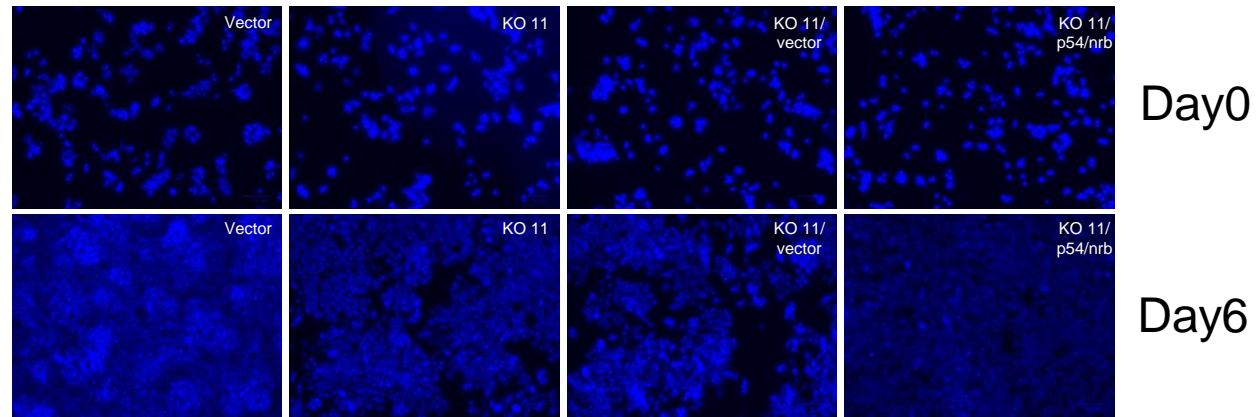

B

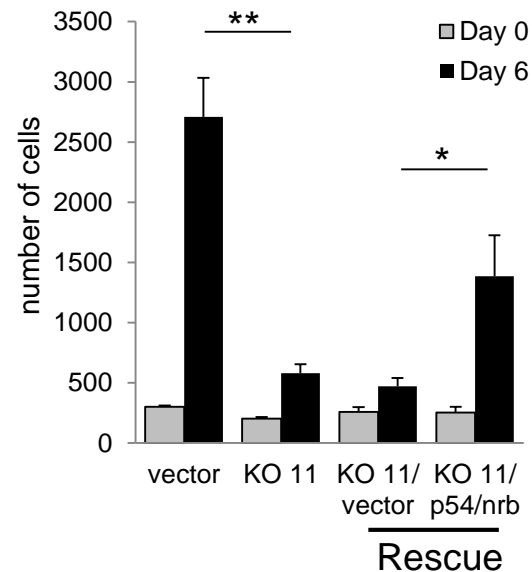

Fig. S4 Re-expression of p54/nrb enhances tumor cell growth. (A) p54/nrb KO #11 cells were transduced with pCDH-Myc vector (vector) or pCDH-Myc-p54/nrb (p54/nrb) and then plated out in 12-well plates in the absence of androgen. Relative cell growth was measured by hoechst staining at Day 6. Numbers of cells were counted in 3 random fields per group under a microscope ( $\times 20$  magnification). (B) Quantification of hoechst staining data. Values are mean  $\pm$  SE ( $n = 3$ ). \*,  $p < 0.05$ \*\* $p < 0.01$ .

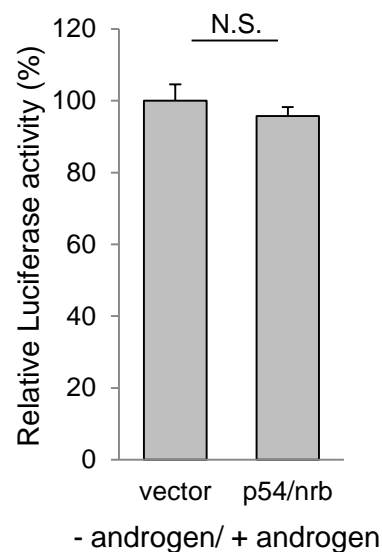

Fig. S5. Ectopic expression of p54/nrb has no effect on PCGEM1 promoter luciferase activity. 5.1/3.1 fragment upstream of PCGEM1 was cloned into pGL3-Basic as a luciferase reporter (refer to Fig 1F, top). LNCaP cells were co-transfected with the luciferase reporter and either vector or p54/nrb, and cultured in the presence or absence of androgen (- androgen or + androgen) for 3 days before harvesting for luciferase assay. Values are mean  $\pm$  SE ( $n = 3$ ). N.S., not significant.



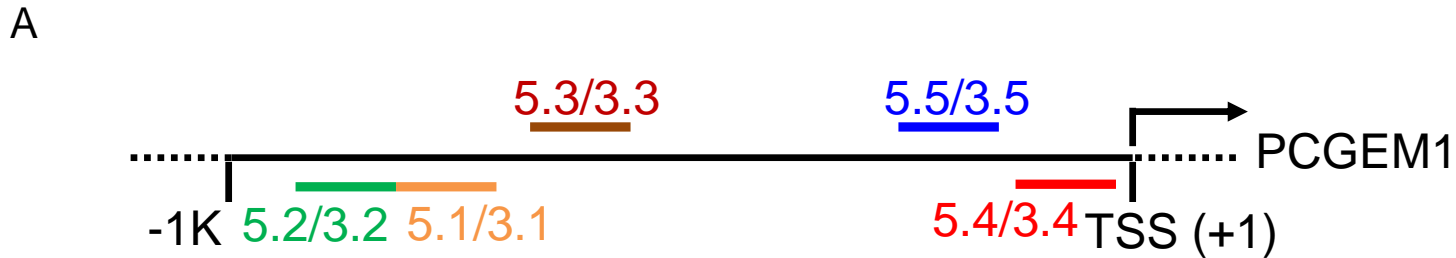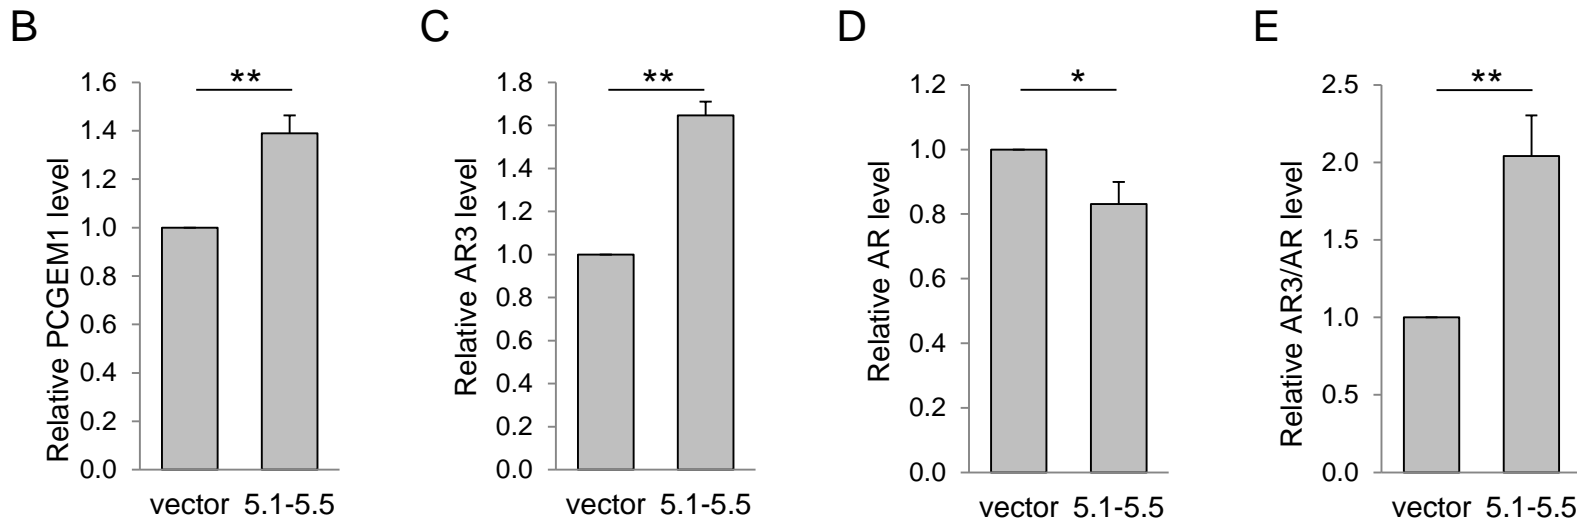

Fig. S6 SAM-mediated sgRNAs activate PCGEM1 and AR3. (A) Schematic presentation of PCGEM1 promoter, and the targeting locations of the respective SAM-mediated sgRNAs. The numbers below the PCGEM1 promoter indicate the position relative to TSS. Fold activation of (B) PCGEM1 and (C) AR3 transcripts by SAM (a combination of five sgRNAs). (D) A decrease in total AR expression by SAM. (E) An increase ratio of AR3 over AR by SAM. Values are mean  $\pm$  SE (n = 3). \*, p < 0.05. \*\*, p < 0.01.

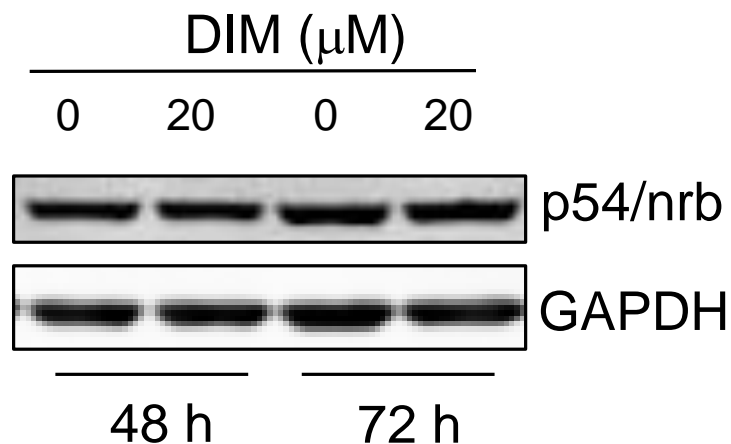

Fig. S7 DIM has no effect on the p54/nrb level. CWR22Rv1 cells were treated with vehicle control (DMSO) or 20  $\mu$ M of DIM for 48 h and 72 h, and the p54/nrb protein levels were determined by Western blot.

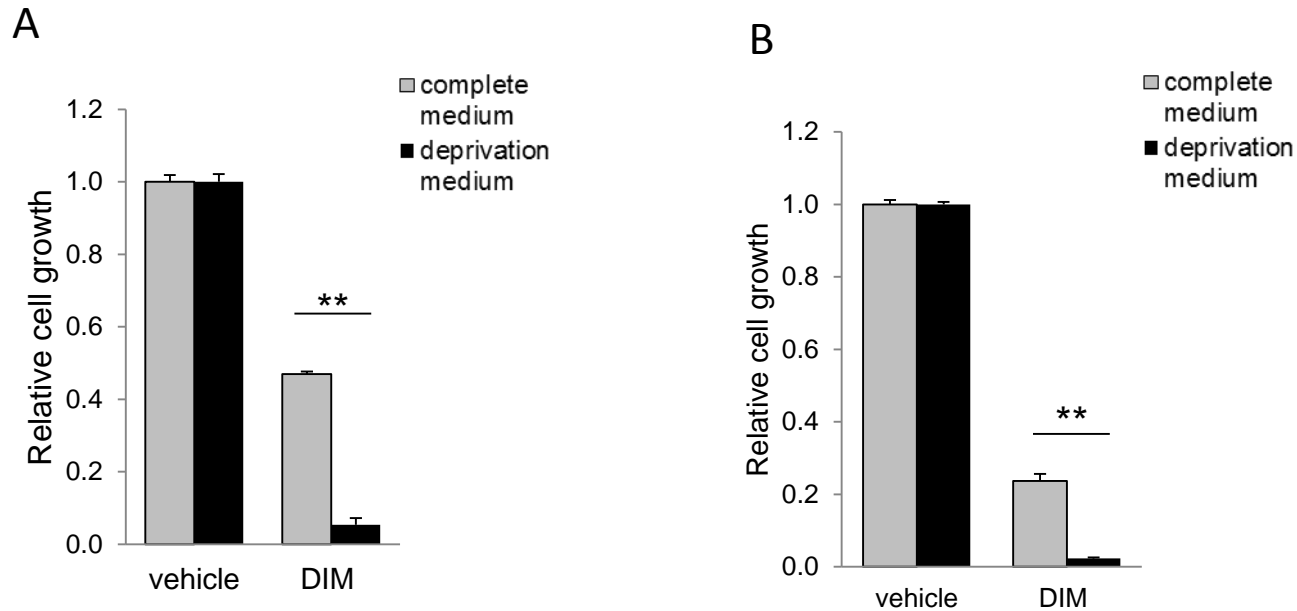

Fig. S8 DIM sensitizes LNCaP (A) and CWR22Rv1 (B) cells to androgen deprivation. Cells were plated out and cultured in 96-well plates in the presence (complete medium) or absence of androgen (deprivation medium). These cells were subject to vehicle control (DMSO) or 50  $\mu$ M of DIM. Relative cell growth was measured by MTT assays at Day 4 after DIM administration. Values are mean  $\pm$  SE (n = 3). \*\*, p < 0.01.

Additional supplementary materials

# Quantification of proteins associated with figures as indicated

1C

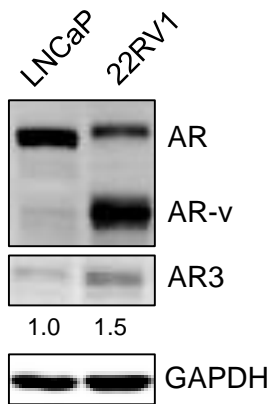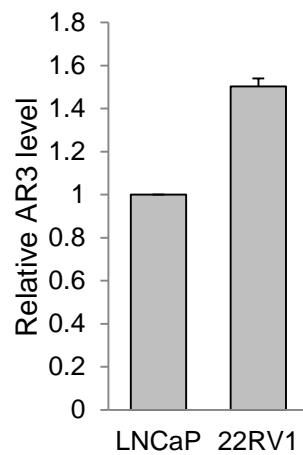

3C

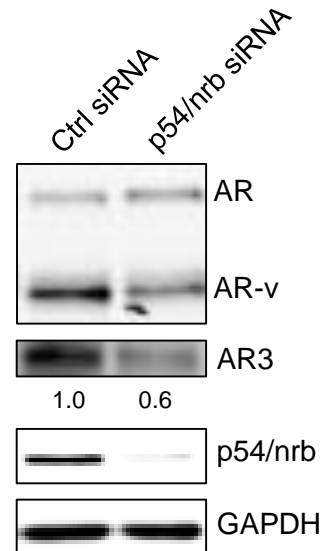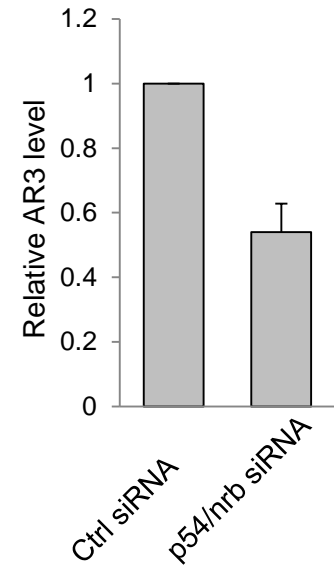

4B

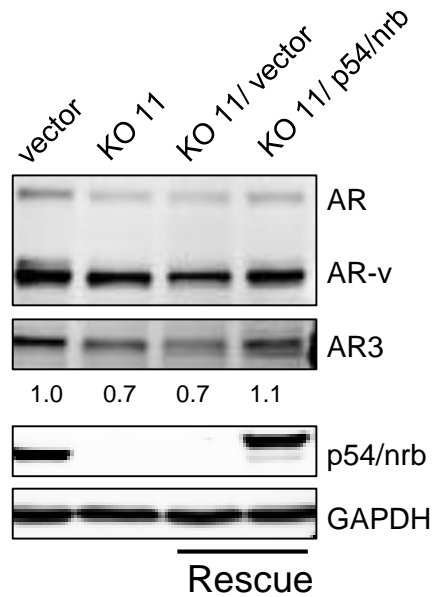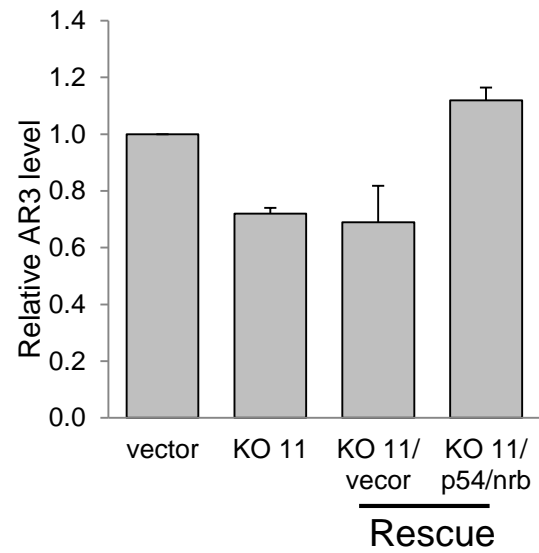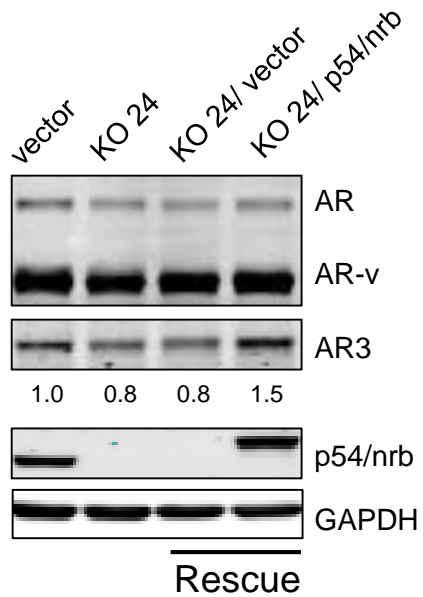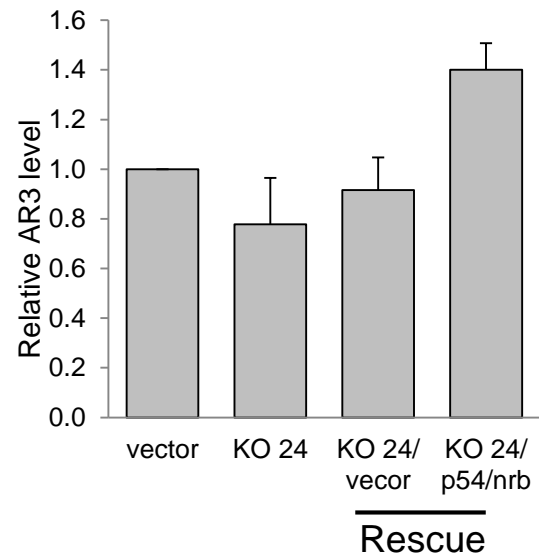

5B

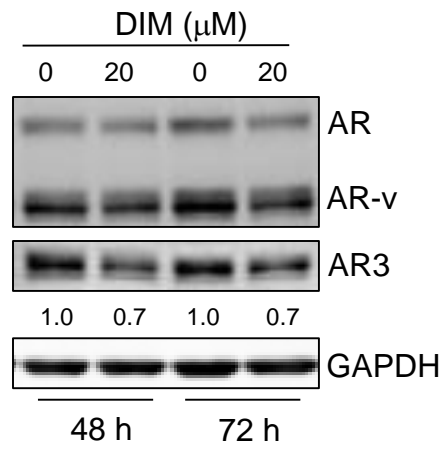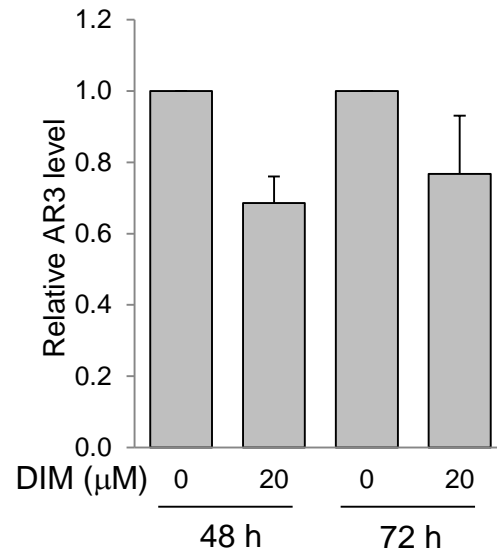

Original gel pictures associated with figures indicated

Fig. 1C

1C

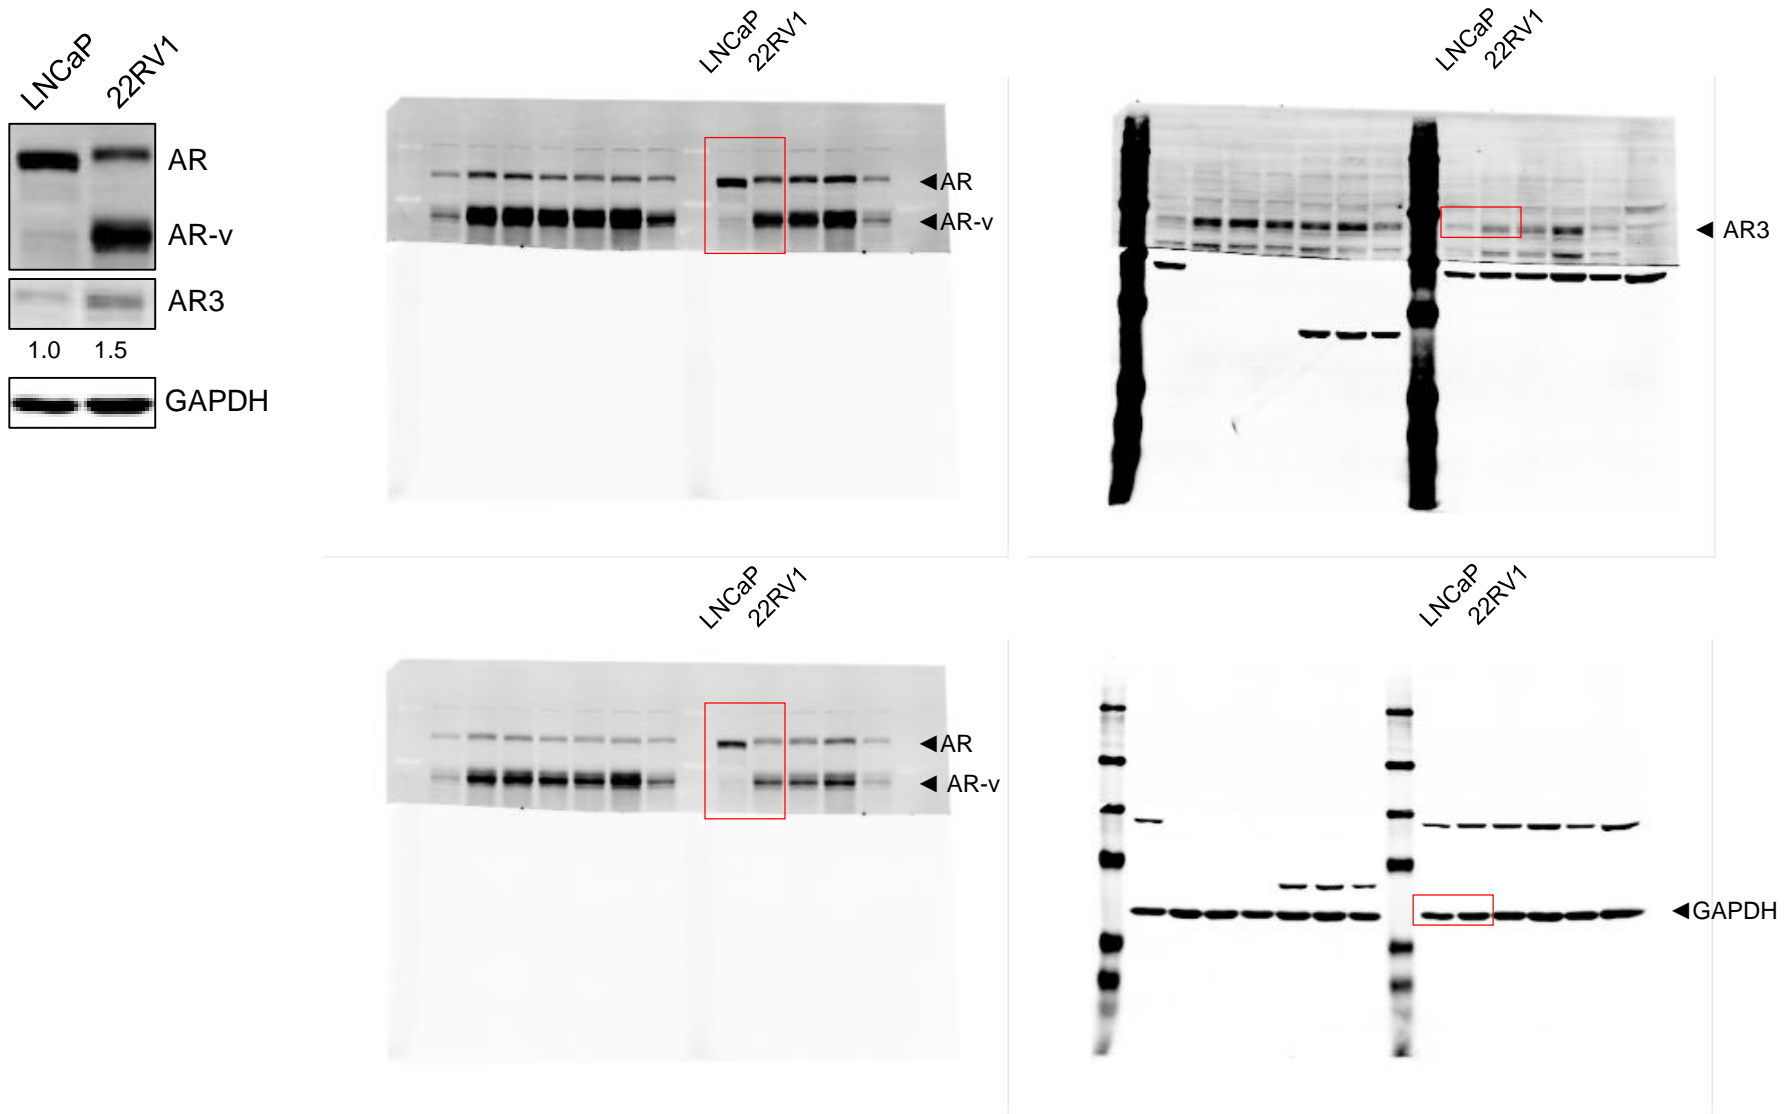



Fig. 2B

2B

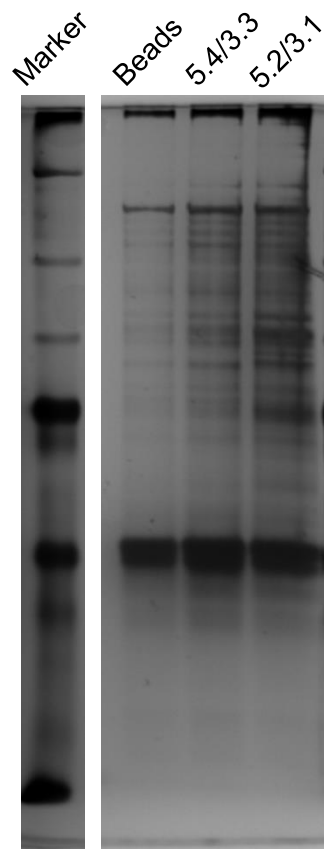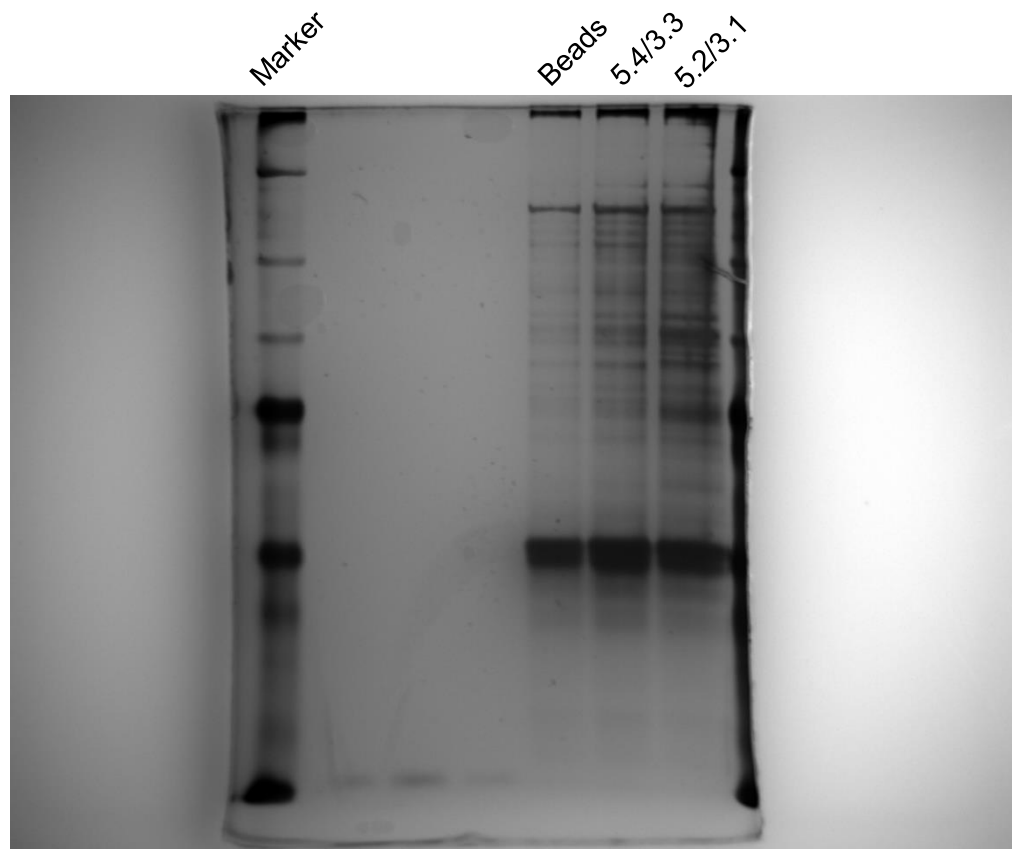

Fig. 2C

2C

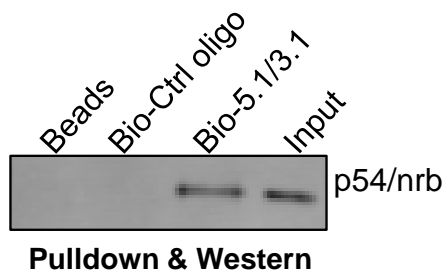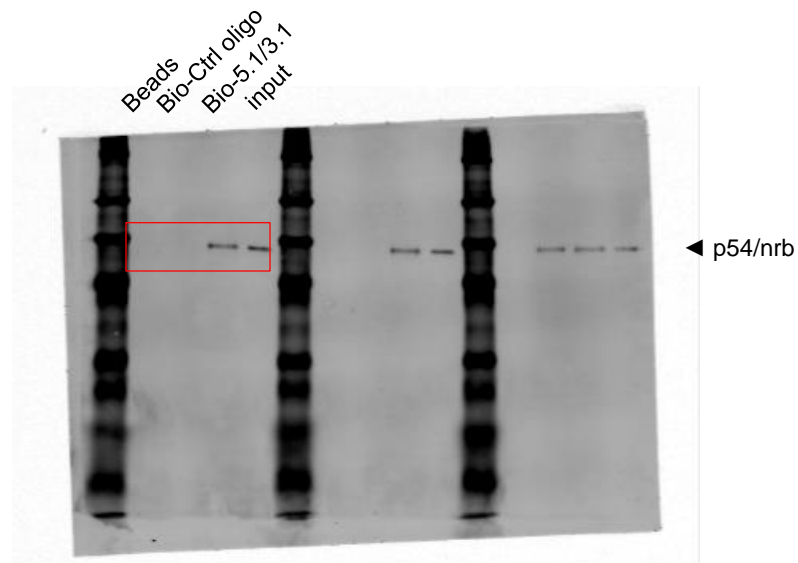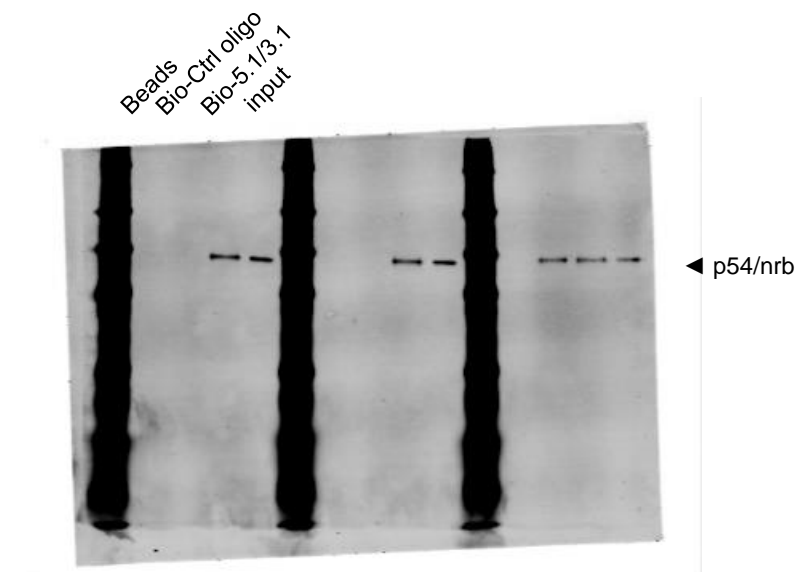

Fig. 2D

2D

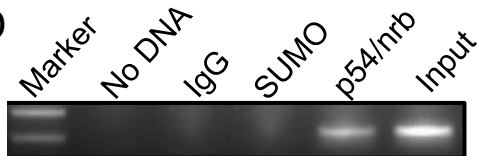

ChIP with primers ChiP-5.1/3.1

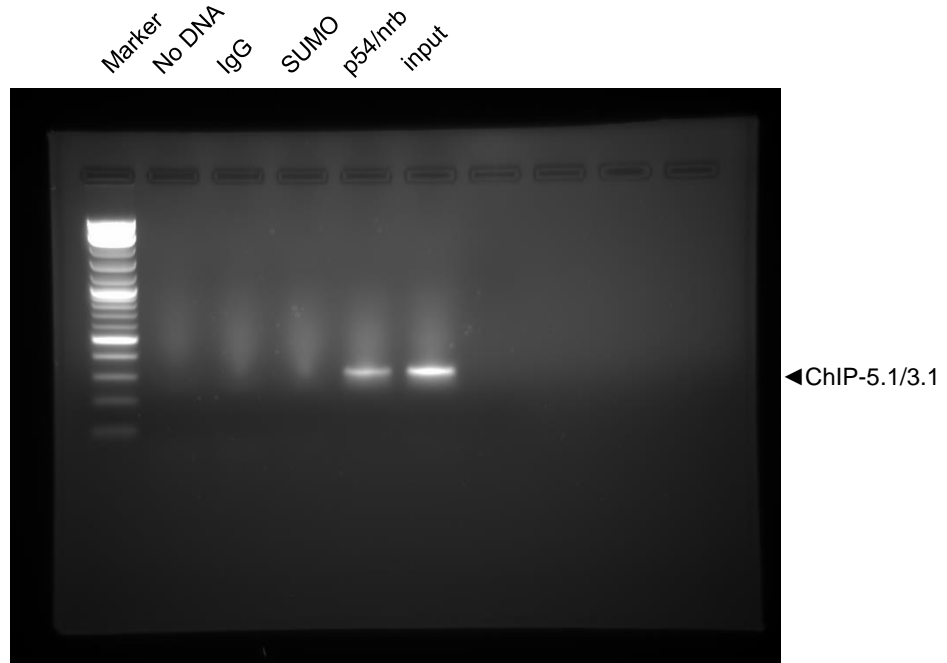

Fig. 3C

3C

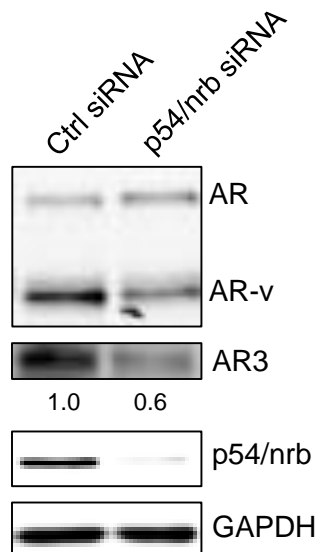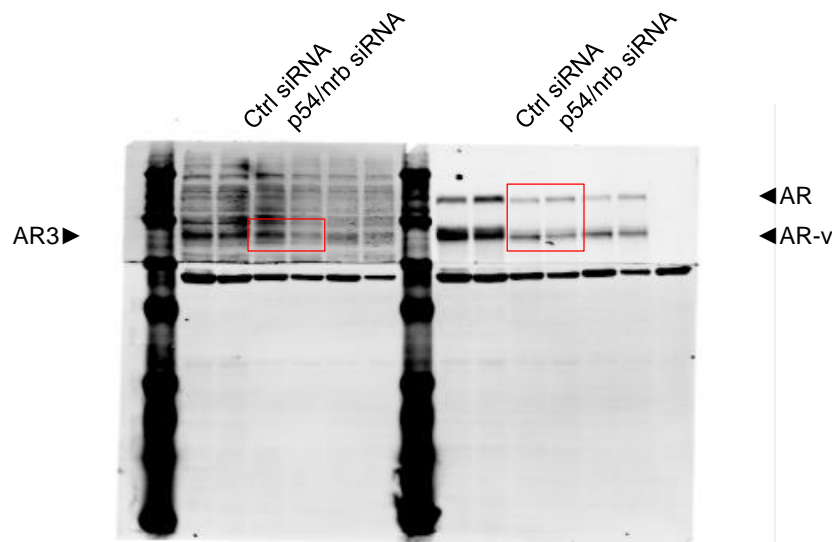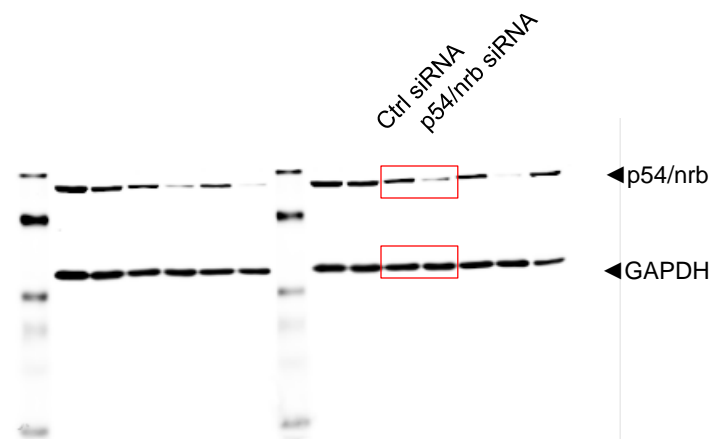

Fig. 4B

4B

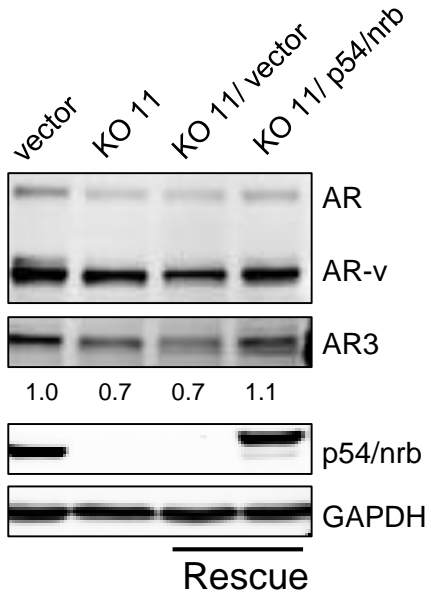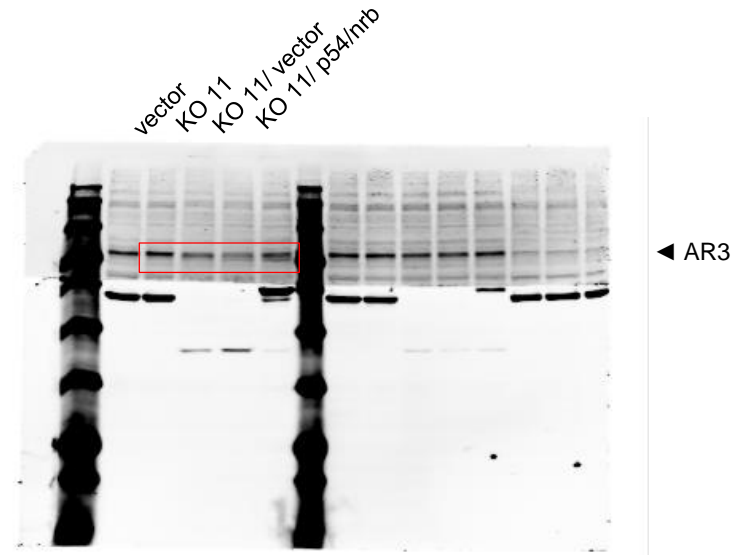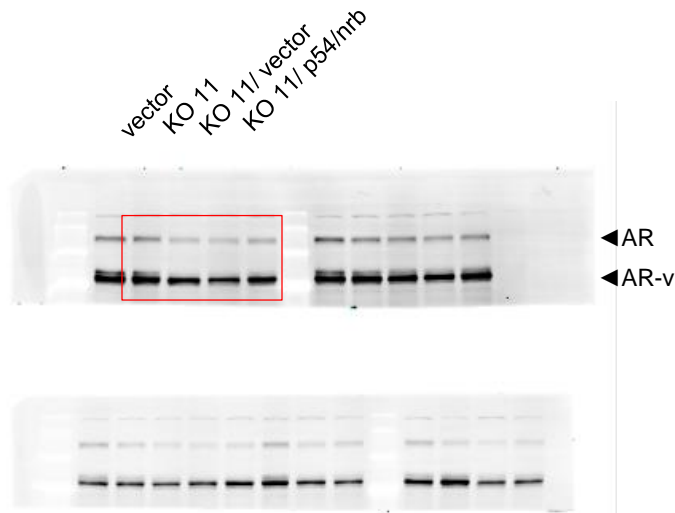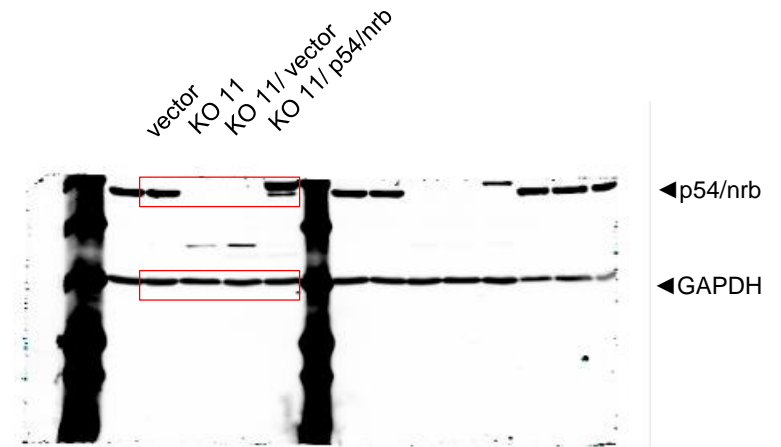

Fig. 4B (cont'd)

4B (cont'd)

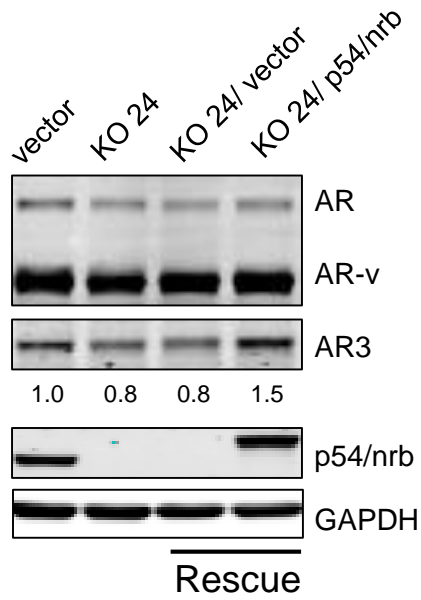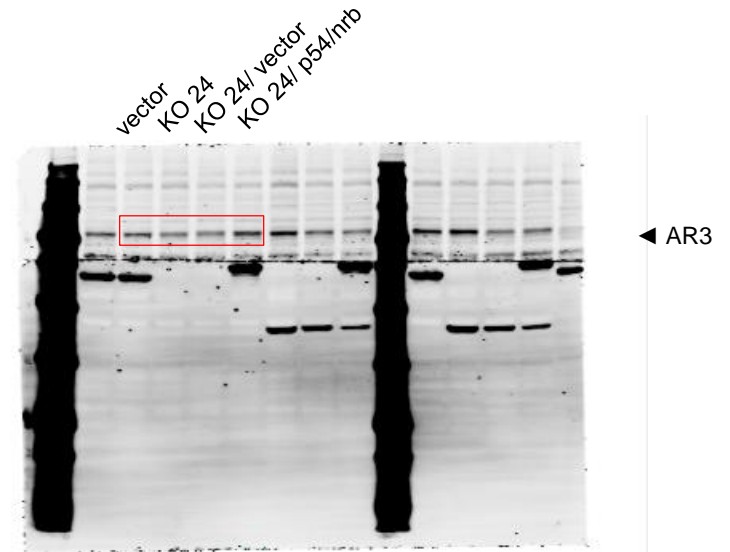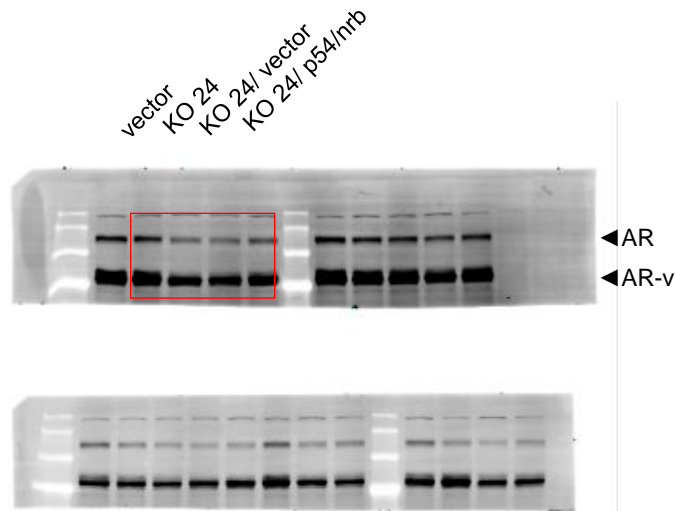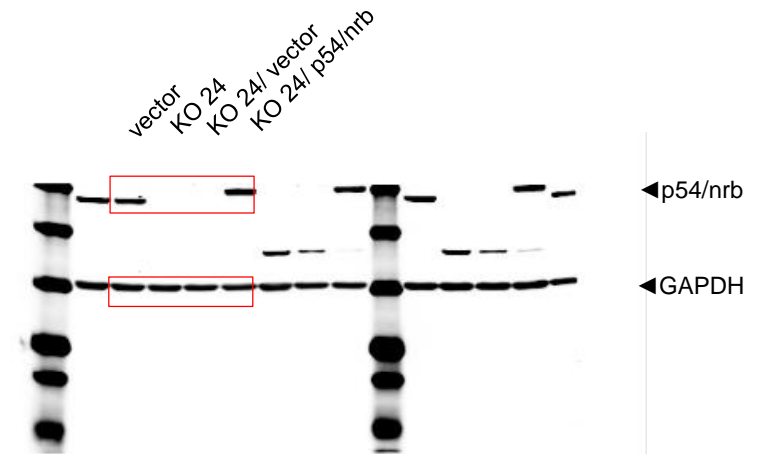

Fig. 5B

5B

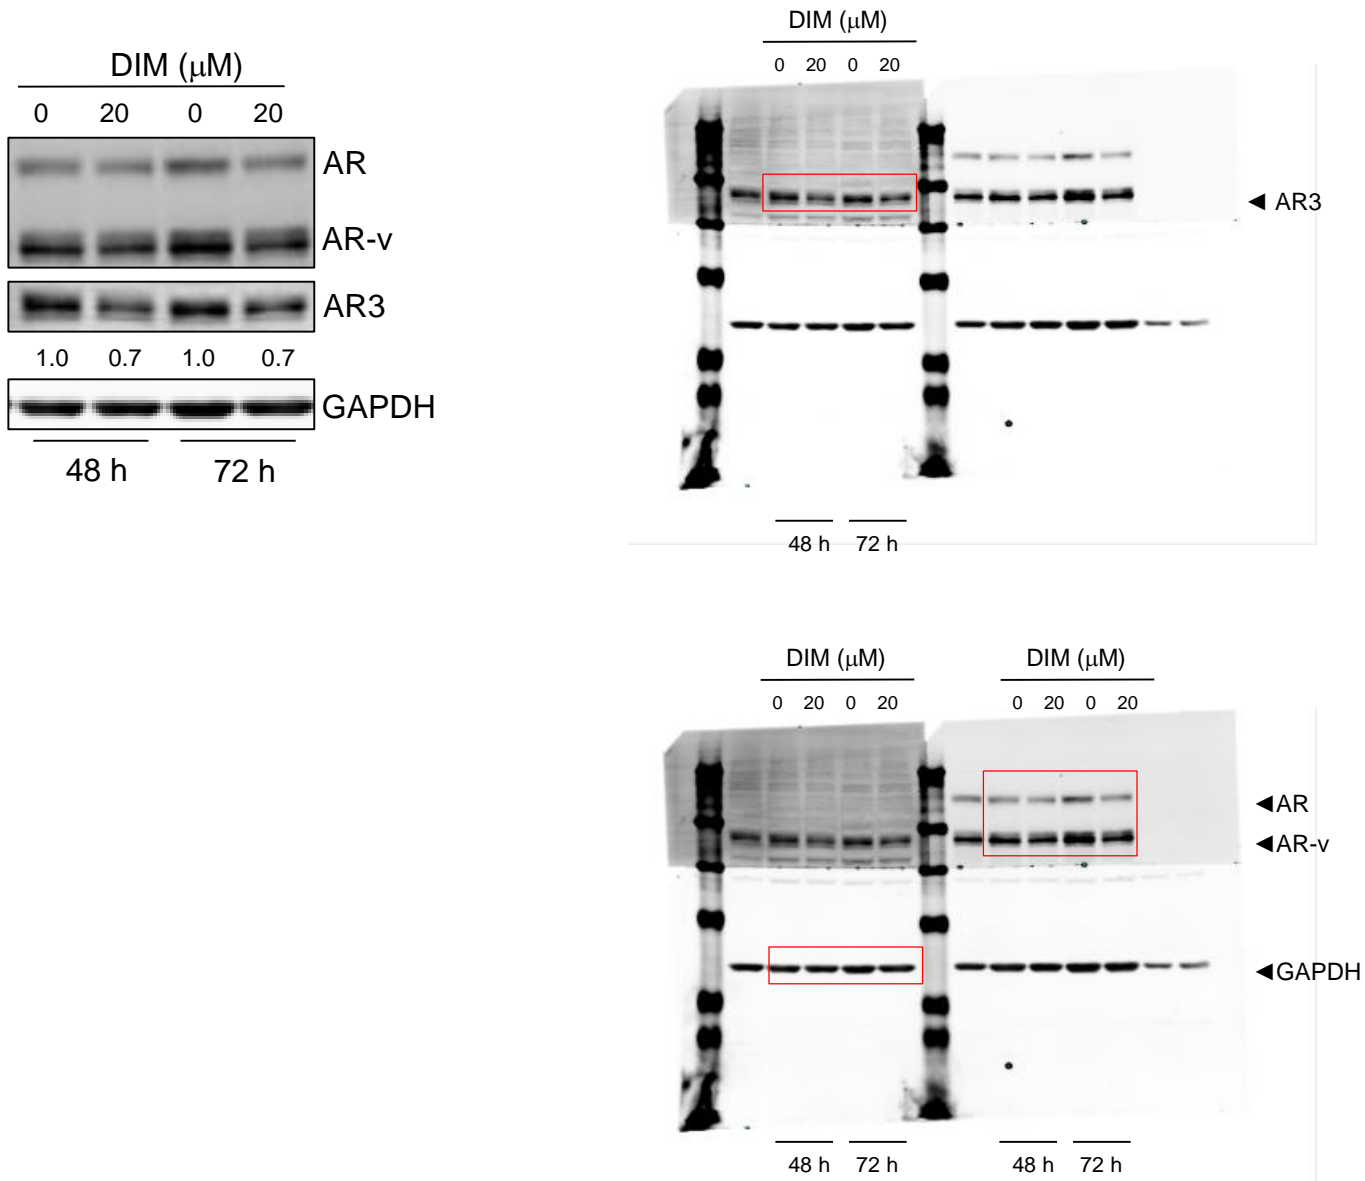

Fig. 5C

5C

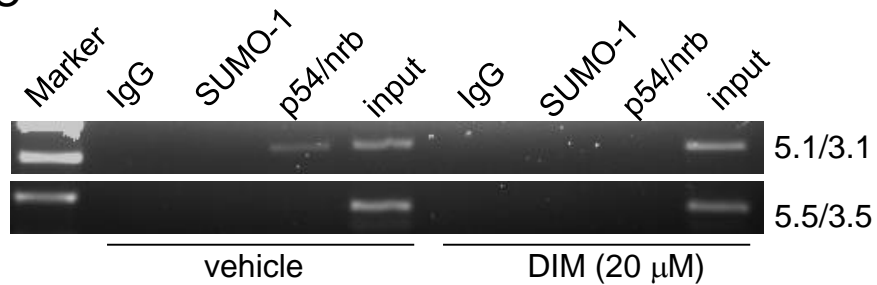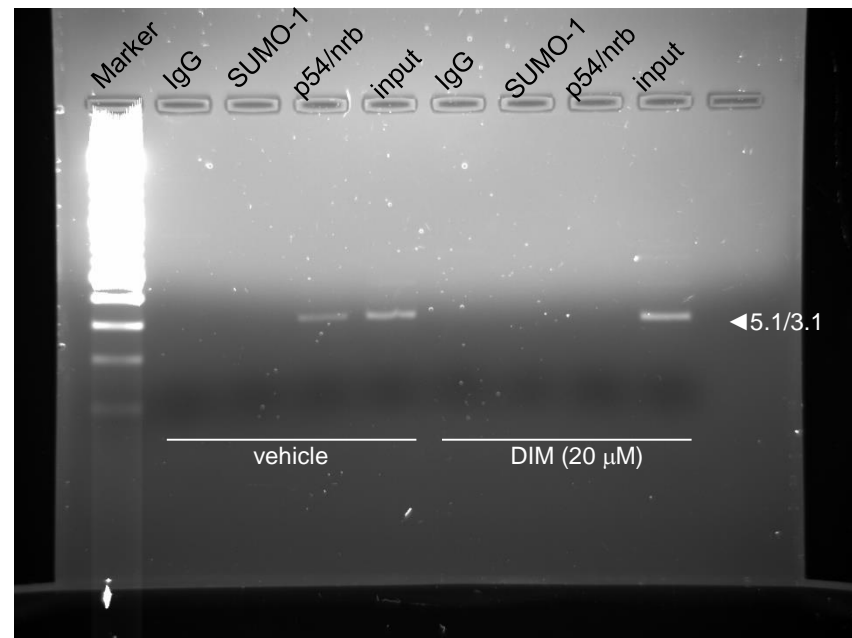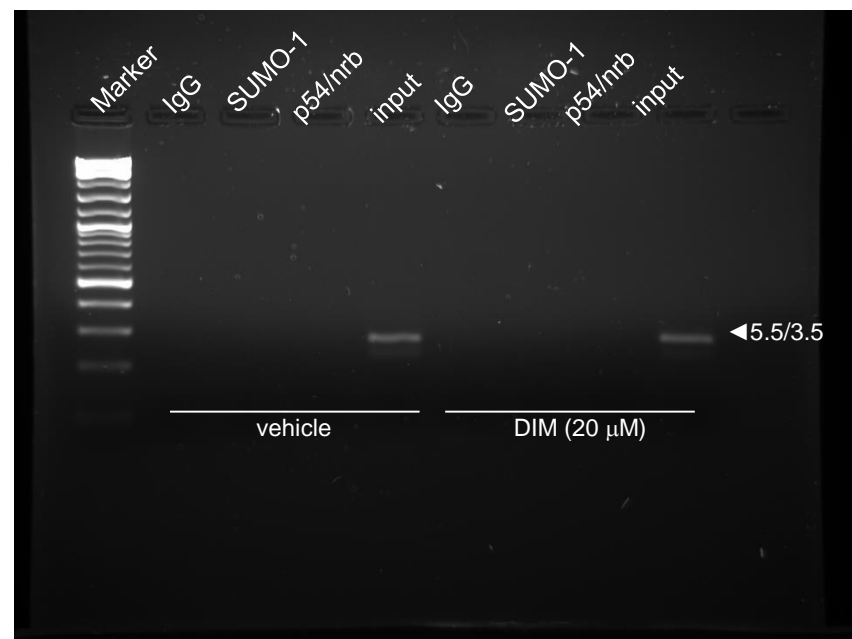



Fig. 5D

5D

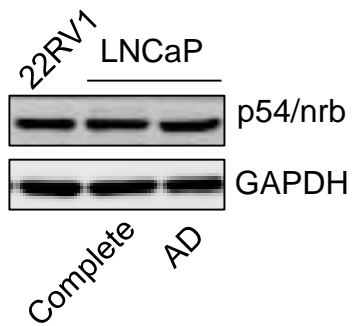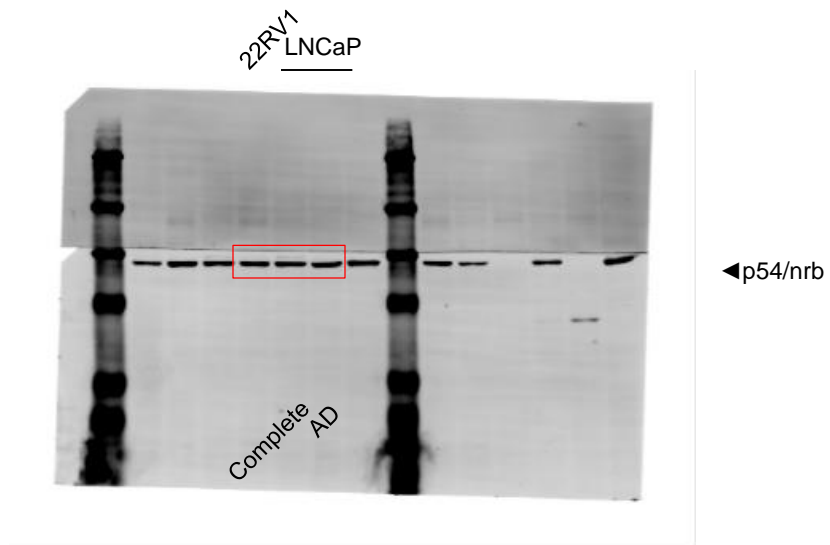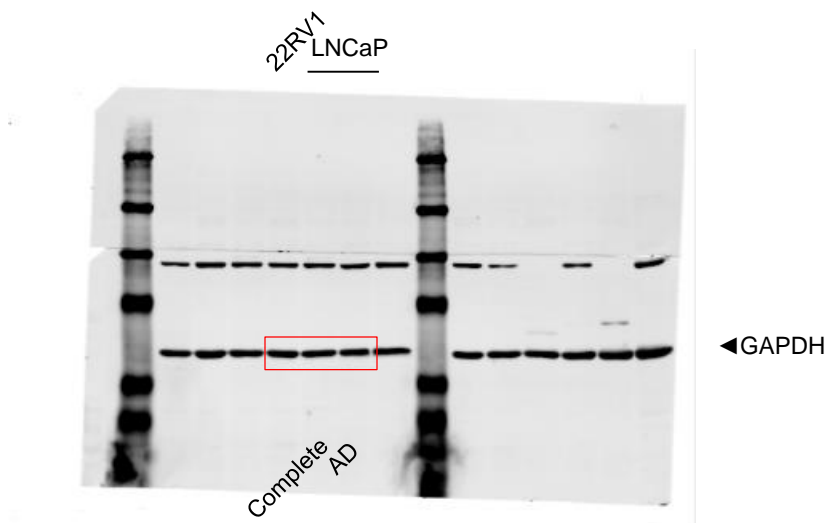

Fig. 5E

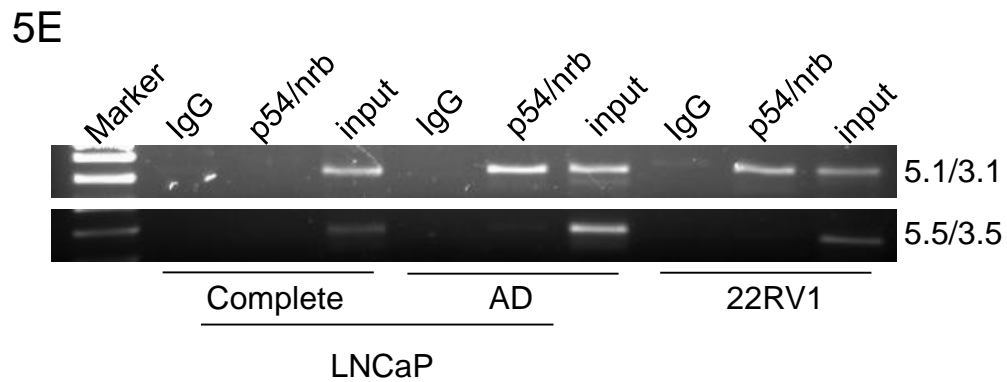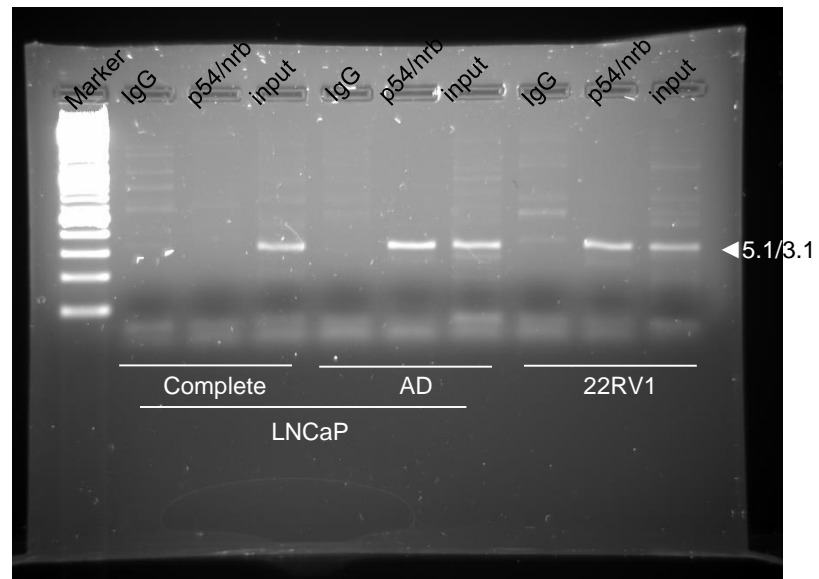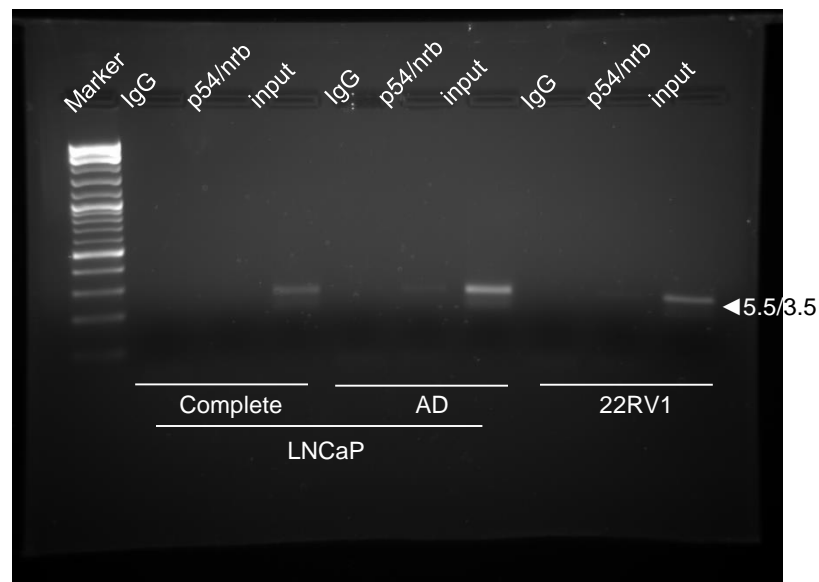

Supplement: srep34529-s1.pdf [file srep34529-s1.pdf]
